# Supplementary material for: Ciliary tip actin dynamics regulate photoreceptor outer segment integrity
Source: PubMed Central journal article supplement (PMC11109262; doi:10.1038/s41467-024-48639-w), 2024-05-21
Supplement: 41467_2024_48639_MOESM3_ESM.pdf [file 41467_2024_48639_MOESM3_ESM.pdf]

## Description of Additional Supplementary Files

**File Name: Supplementary Data 1**

**Description: Mass spectrometry of 3 month old *Rpgr*<sup>Ex3d8</sup> and wild type retina.**

**File Name: Supplementary Data 2**

**Description: Mass spectrometry of 6 week old *Rpgr*<sup>Ex3d8</sup> and wild type outer segments.**

**File Name: Supplementary Movie 1**

**Description: Movie of rotating 3D tomogram of a wild type photoreceptor connecting cilium at the level of the basal disc.** Segmented reconstruction is overlaid to highlight the ciliary and disc membranes (green), microtubule-based axoneme (cyan) and microfilaments (purple). Microfilaments extend from the connecting cilium into the basal disc. Slice from this tomogram is displayed in Fig. 1b & c.

**File Name: Supplementary Movie 2**

**Description: Movie of tomographic slices along the y axis of a 3D reconstruction of a wild type photoreceptor connecting cilium at the level of the basal disc.** Slice from this tomogram is displayed in Fig. 5a.

**File Name: Supplementary Movie 3**

**Description: Movie of tomographic slices along the y axis of a 3D reconstruction of a *Rpgr*<sup>Ex3d8</sup> photoreceptor connecting cilium at the level of the basal disc.** Slice from this tomogram is displayed in Fig 5b.

**File Name: Supplementary Movie 4**

**Description: Movie of rotating 3D tomogram of a wild type photoreceptor connecting cilium at the level of the basal disc.** Reconstruction is overlaid to highlight the ciliary and disc membranes (cyan), microtubule based axoneme (tan) and actin filaments (purple). Slice from this tomogram is displayed in Fig. 5a.

**File Name: Supplementary Movie 5**

**Description: Movie of rotating 3D tomogram of a *Rpgr*<sup>Ex3d8</sup> photoreceptor connecting cilium at the level of the basal disc.** Reconstruction is overlaid to highlight the ciliary and disc membranes (cyan), microtubule based axoneme (tan) and actin filaments (purple). Slice from this tomogram is displayed in Fig. 5b.

**File Name: Supplementary Movie 6**

**Description: Subtomogram averaged maps (after imposing helical symmetry) of actin from wild type (left with fitted cofilactin model (3J0S pdb)) and *Rpgr*<sup>Ex3d8</sup> (right, with fitted F-actin model (3J0S pdb)) connecting cilia.**
